# Supplementary material
Source: Springer Nature journal article supplement (https://www.springermedizin.de/resource/supplementary/13063_2013_2030_MOESM1_ESM.pdf/9621134)
Supplement: MOESM1 [file 9621134]

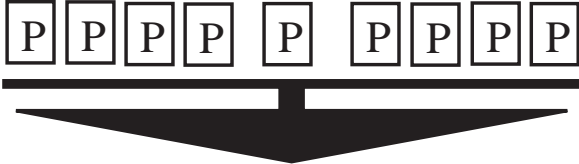

**Baseline data collection 18 practices randomised with 80 COPD patients each**

**Study group: 9 practices**

**Control group: 9 practices**

**End of the study data collection**

**Questionnaire for GPs**

**Review of patient's history**

**Questionnaire for patients**

**Interviews**

**Focus Groups**
